# Supplementary material
Source: PubMed Central journal article supplement (PMC3700115)
Supplement: MCB.01692-12_zmb999100015so1.pdf [file MCB.01692-12_zmb999100015so1.pdf]

## Supplemental Material (Scharf et al.)

Supplementary Table S1

| DESCRIPTION                                                       | LOCUS         | MK2/3 <sup>-/-</sup> |
|-------------------------------------------------------------------|---------------|----------------------|
| <b>ANGIOGENESIS</b>                                               |               |                      |
| angiopoietin 1                                                    | Angpt1        | 2.324                |
| angiopoietin-like 7                                               | Angptl7       | 5.202                |
| <b>CD55 antigen</b>                                               | <b>Cd55</b>   | <b>-1.622</b>        |
| <b>CARBOHYDRATE METABOLISM</b>                                    |               |                      |
| <i>aldolase A, fructose-bisphosphate</i>                          | <b>Aldoa</b>  | <b>-1.649</b>        |
| <i>enolase 3, beta muscle</i>                                     | <b>Eno3</b>   | <b>-1.711</b>        |
| fructose bisphosphatase 2                                         | Fbp2          | 1.504                |
| glycogen synthase 1, muscle                                       | Gys1          | 2.632                |
| lactate dehydrogenase B                                           | Ldhb          | 1.444                |
| phosphoenolpyruvate carboxykinase 1, cytosolic                    | Pck1          | 1.486                |
| <b>phosphoglycerate kinase 1 (Pgk1)</b>                           | <b>Pgk1</b>   | <b>-1.935</b>        |
| <b>CELL GROWTH</b>                                                |               |                      |
| insulin-like growth factor binding protein 6                      | Igfbp6        | 1.555                |
| <b>myostatin</b>                                                  | <b>Mstn</b>   | <b>-2.542</b>        |
| myogenin                                                          | Myog          | 1.344                |
| <b>CONTRACTILE APPARATUS</b>                                      |               |                      |
| actin, alpha 1, skeletal muscle                                   | Acta1         | 1.005                |
| myosin binding protein C, slow-type                               | Mybpc1        | 2.363                |
| <b>myosin binding protein C, fast-type</b>                        | <b>Mybpc2</b> | <b>-3.788</b>        |
| myosin binding protein H                                          | Mybph         | 2.251                |
| <b>myosin, heavy polypeptide 1 (d/x), skeletal muscle, adult</b>  | <b>Myh1</b>   | <b>-2.289</b>        |
| myosin, heavy polypeptide 2 (IIa), skeletal muscle, adult         | Myh2          | 1.581                |
| myosin, heavy polypeptide 3, skeletal muscle, embryonic           | Myh3          | 3,208                |
| <b>myosin, heavy polypeptide 4 (IIb), skeletal muscle</b>         | <b>Myh4</b>   | <b>-2.227</b>        |
| myosin, heavy polypeptide 6, cardiac muscle, alpha                | Myh6          | 1,594                |
| myosin, heavy polypeptide 7 (I/β), cardiac muscle, beta           | Myh7          | 1.718                |
| <b>myosin, light polypeptide 1, MLC1F/MLC3F</b>                   | <b>Myll</b>   | <b>-2.478</b>        |
| myosin, light polypeptide 3, MLC1v/MLC1s                          | Myl3          | 1.370                |
| <b>myosin light chain, phosphorylatable, fast skeletal muscle</b> | <b>Mylpf</b>  | <b>-1.784</b>        |
| PDZ and LIM domain 3                                              | Pdlim3        | 1.159                |
| troponin I, skeletal, slow 1                                      | Tnni1         | 1.329                |
| <b>troponin I, skeletal, fast 2</b>                               | <b>Tnni2</b>  | <b>-1.469</b>        |
| troponin T1, skeletal, slow                                       | Tnnt1         | 1.457                |
| <b>FAT METABOLISM</b>                                             |               |                      |
| ATP-binding cassette, sub-family B (MDR/TAP), member 1A           | Abcb1a        | 1.350                |
| ATP-binding cassette, sub-family D (ALD), member 2                | Abcd2         | 2.065                |
| acyl-Coenzyme A dehydrogenase, short chain                        | Acads         | 1.495                |
| catalase                                                          | Cat           | 1.810                |
| CD36 antigen                                                      | Cd36          | 1.751                |
| carnitine palmitoyltransferase 1b, muscle                         | Cpt1b         | 2.000                |
| fatty acid binding protein 3, muscle and heart                    | Fabp3         | 1.760                |
| <b>fatty acid binding protein 5, epidermal</b>                    | <b>Fabp5</b>  | <b>-1.371</b>        |
| fatty acid synthase                                               | Fasn          | 2.032                |
| Lipase, hormone sensitive                                         | Lipe          | 1.576                |
| lipoprotein lipase                                                | Lpl           | 1.670                |
| pyruvate dehydrogenase kinase, isoenzyme 4                        | Pdk4          | 1.362                |
| resistin                                                          | Retn          | 2.046                |
| stearoyl-Coenzyme A desaturase 1                                  | Scd1          | 1.662                |
| solute carrier family 27                                          | Slc27a1       | 1.893                |
| uncoupling protein 3                                              | Ucp3          | 1.388                |
| UEV and lactate/malate dehydrogenase domains                      | Uevld         | 2.355                |
| <b>HEAT SHOCK RESPONSE</b>                                        |               |                      |
| crystallin, alpha B                                               | Cryab         | 2.163                |
| heat shock protein 1                                              | Hspb1         | 1.712                |

MK2/3 regulate cross-striated muscle function

|                                                                                                                                                                                                                                                                                                                                                                                                                                                                                                                                                                                                                                                                                                                                                                                                                                                                                                                                      |                                                                                                                                                                                                                               |                                                                                                                                                                                                   |
|--------------------------------------------------------------------------------------------------------------------------------------------------------------------------------------------------------------------------------------------------------------------------------------------------------------------------------------------------------------------------------------------------------------------------------------------------------------------------------------------------------------------------------------------------------------------------------------------------------------------------------------------------------------------------------------------------------------------------------------------------------------------------------------------------------------------------------------------------------------------------------------------------------------------------------------|-------------------------------------------------------------------------------------------------------------------------------------------------------------------------------------------------------------------------------|---------------------------------------------------------------------------------------------------------------------------------------------------------------------------------------------------|
| <p><b>INTERSTITIAL TISSUE COMPONENT / EXTRACELLULAR MATRIX</b><br/> collagen, type XVI, alpha 1<br/> collagen, type I, alpha 1<br/> matrix metalloproteinase 2<br/> tissue inhibitor of metalloproteinase 2<br/> tenascin C<br/> Tenomodulin</p>                                                                                                                                                                                                                                                                                                                                                                                                                                                                                                                                                                                                                                                                                     | <p>Coll16a1<br/> Coll1a1<br/> Mmp2<br/> Timp2<br/> Tnc<br/> Tnmd</p>                                                                                                                                                          | <p>1.652<br/> 1.597<br/> 1.658<br/> 1.855<br/> 4.979<br/> 5.219</p>                                                                                                                               |
| <p><b>MITOCHONDRIAL PROTEINS</b><br/> ATP synthase, H<sup>+</sup> transporting, mitochondrial F1 complex, alpha subunit 1<br/> ATP synthase, H<sup>+</sup> transporting, mitochondrial F1 complex, beta subunit<br/> mitochondrially encoded cytochrome c oxidase I<br/> mitochondrially encoded cytochrome c oxidase II<br/> mitochondrially encoded cytochrome c oxidase III<br/> <i>microsomal glutathione S-transferase 1</i><br/> microsomal glutathione S-transferase 2<br/> NADH dehydrogenase (ubiquinone) flavoprotein 1<br/> NADH dehydrogenase (ubiquinone) flavoprotein 2<br/> NADH dehydrogenase (ubiquinone) flavoprotein 3<br/> pyruvate dehydrogenase complex, component X<br/> solute carrier family 25<br/> (mitochondrial carnitine/acylcarnitine translocase), member 20<br/> solute carrier family 25<br/> (mitochondrial carrier, phosphate carrier), member 25<br/> superoxide dismutase 2, mitochondrial</p> | <p>Atp5a1<br/> Atp5b<br/> COX1<br/> COX2<br/> COX3<br/> <i>Mgst1</i><br/> Ndufv1<br/> Ndufv2<br/> Ndufv3<br/> Mgst2<br/> Pdhx<br/> Slc25a20<br/> Slc25a25<br/> Sod2</p>                                                       | <p>1.725<br/> 1.844<br/> 2.153<br/> 1.610<br/> 1.368<br/> -1.575<br/> 1.761<br/> 1.592<br/> 1.975<br/> 1.753<br/> 1.627<br/> 1.602<br/> 2.876<br/> 2.060</p>                                      |
| <p><b>OXYGEN CARRIERS</b><br/> hemoglobin, beta adult major chain<br/> myoglobin<br/> <i>solute carrier family 38, member 4</i></p>                                                                                                                                                                                                                                                                                                                                                                                                                                                                                                                                                                                                                                                                                                                                                                                                  | <p>Hbb-b2<br/> Mb<br/> <i>Slc38a4</i></p>                                                                                                                                                                                     | <p>1.819<br/> 1.479<br/> -1.824</p>                                                                                                                                                               |
| <p><b>TRANSCRIPTION</b><br/> ankyrin repeat domain 2<br/> <i>calcium channel, voltage-dependent, L type, skeletal muscle, Cav1.1</i><br/> CCAAT/enhancer binding protein (C/EBP), delta<br/> cAMP responsive element binding protein 1<br/> <i>E2F transcription factor 2</i><br/> <i>early growth response 1</i><br/> HOP homeobox<br/> Jun oncogene<br/> myocyte enhancer factor 2C<br/> nuclear factor of activated T-cells, cytoplasmic<br/> nuclear receptor subfamily 4, group A, member 2<br/> nuclear respiratory factor 1<br/> paired box gene 7<br/> Plexin A1<br/> peroxisome proliferative activated receptor, gamma, coactivator 1 alpha, PGC-1α<br/> <i>retinol binding protein 1, cellular</i><br/> <i>serum response factor</i></p>                                                                                                                                                                                  | <p>Ankrd2<br/> <i>Cacna1s</i><br/> Cebpd<br/> Creb1<br/> <i>E2f2</i><br/> <i>Egr1</i><br/> Hopx<br/> Jun<br/> Mef2c<br/> Nfatc1<br/> Nr4a2<br/> Nrf1<br/> Pax7<br/> Plxna1<br/> Ppargc1a<br/> <i>Rbp1</i><br/> <i>Srf</i></p> | <p>3.631<br/> -1.030<br/> 2.010<br/> 1.830<br/> -1.096<br/> -1.926<br/> 1.026<br/> 1.568<br/> 1.702<br/> 2.712<br/> 3.079<br/> 2.040<br/> 2.627<br/> 1.130<br/> 2.456<br/> -2.282<br/> -1.025</p> |
| <p><b>TRANSPORT</b><br/> ATPase, Ca<sup>2+</sup> transporting (<i>SERCA1</i>), fast twitch 1<br/> ATPase, Ca<sup>2+</sup> transporting (<i>SERCA2</i>), slow twitch 2<br/> Phospholamban<br/> ryanodine receptor 1, skeletal muscle (Ryr1)<br/> ryanodine receptor 2, cardiac (Ryr2)<br/> sodium channel, voltage-gated, type V, alpha<br/> solute carrier family 2 (facilitated glucose transporter), member 1<br/> solute carrier family 1 (neutral amino acid transporter), member 5<br/> sodium/calcium exchanger, member 1, NCX1<br/> <i>sodium/calcium exchanger, member 2, NCX2</i><br/> <i>sodium/calcium exchanger, member 3, NCX3</i><br/> <i>transporter 1, ATP-binding cassette</i><br/> Transferrin</p>                                                                                                                                                                                                                 | <p><i>Atp2a1</i><br/> Atp2a2<br/> Pln/Plb<br/> RyR1<br/> RyR2<br/> Scn5a<br/> Slc2a1<br/> Slc1a5<br/> Slc8a1<br/> <i>Slc8a2</i><br/> <i>Slc8a3</i><br/> <i>Tap1</i><br/> Trf</p>                                              | <p>-1.570<br/> 3.148<br/> 1.204<br/> 1.110<br/> 1.106<br/> 1.556<br/> 1.002<br/> 4.620<br/> 1.300<br/> -1.062<br/> -1.352<br/> -2.736<br/> 1.539</p>                                              |

## MK2/3 regulate cross-striated muscle function

|                                                           |                 |               |
|-----------------------------------------------------------|-----------------|---------------|
| <b>OTHERS</b>                                             |                 |               |
| adrenergic receptor, beta 3                               | Adrb3           | 2.435         |
| annexin A6                                                | Anxa6           | 2.105         |
| aldehyde dehydrogenase family 3, subfamily A1             | Aldh3a1         | 1.977         |
| arrestin domain containing 2                              | Arrdc2          | 3.173         |
| <b>cDNA sequence BC053393</b>                             | <b>BC053393</b> | <b>-5.625</b> |
| <b>calsequestrin 1, fast type skeletal muscle isoform</b> | <b>Casq1</b>    | <b>-1.362</b> |
| calsequestrin 2, cardiac muscle isoform                   | Casq2           | 1.812         |
| calcium/calmodulin-dependent protein kinase II, alpha     | Camk2a          | 1.158         |
| calcium/calmodulin-dependent protein kinase II, beta      | Camk2b          | 1.047         |
| calcium/calmodulin-dependent protein kinase II, gamma     | Camk2d          | 1.250         |
| carbonic anhydrase 3                                      | Car3            | 1.295         |
| carbonic anhydrase 4                                      | Car4            | 1.231         |
| cartilage intermediate layer protein 2                    | Cilp2           | 3.021         |
| cadherin 15                                               | Cdh15           | 2.090         |
| <b>creatine kinase, muscle</b>                            | <b>Ckm</b>      | <b>-1.572</b> |
| cartilage oligomeric matrix protein                       | Comp            | 4.296         |
| cytochrome P450, family 2, subfamily e, polypeptide 1     | Cyp2e1          | 1.274         |
| gelsolin                                                  | Gsn             | 2.610         |
| metallothionein 2                                         | Mt2             | 4.452         |
| myomesin family, member 3                                 | Myom3           | 1.810         |
| <b>Ngfi-A binding protein 1</b>                           | <b>Nab1</b>     | <b>-1.033</b> |
| Ngfi-A binding protein 2                                  | Nab2            | 1.047         |
| protein tyrosine phosphatase-like, member b               | Ptpfb           | 1.415         |
| <b>parvalbumin</b>                                        | <b>Pvalb</b>    | <b>-3.504</b> |
| suprabasin                                                | Sbsn            | 2.139         |
| sarcophilin                                               | Sln             | <b>-1.185</b> |
| <b>tropomodulin 3</b>                                     | <b>Tmod3</b>    | <b>-2.081</b> |
| xin actin-binding repeat containing 1                     | Xirp1           | 2.169         |

**Table S1** Effects of MK2/3-deficiency on the expression of functional groups of fiber type-specific genes identified by DNA microarray analysis. Shown is a set of transcripts filtered for genes characteristic of fast and slow muscle fiber types in addition to other classified genes. Changes in mRNA expression in MK2/3<sup>-/-</sup> compared with WT soleus, as revealed by DNA microarray analysis, with down-regulated genes shown in bold. Each sample was pooled from soleus of three mice. Data are the average of n=3 samples in each group.

Beside the altered expression of genes implicated in fiber type-specific gene expression, some of the genes found to be up-regulated in MK2/3-deficient soleus encode for proteins involved in regeneration/repair processes, such as embryonic MyHC (Myh3; see also Fig. 3B) and  $\alpha$ -cardiac MyHC (Myh6), both markers of newly forming myofibers in regenerating muscle (1). Further up-regulated genes are involved in satellite cells activation (11), such as cadherin 15 (Cdh15) and paired box gene 7 (Pax7; see also Fig. 3B). Regeneration requires proliferation of myogenic and non-myogenic cells, often accompanied by increased amounts of connective tissue formation (1). Together with increased expression of components of the extracellular matrix as found in the endo- and epimysium of muscle fibers, like tenomodulin (Tnmd) and collagen type I (Coll1a1), and of a marker of collagen processing, matrix

## MK2/3 regulate cross-striated muscle function

matrix metalloproteinase 2 (Mmp2), the data imply a regeneration/repair process in soleus muscle from MK2/3<sup>-/-</sup> mice.

This process might be caused by down-regulation of myostatin (Mstn), a negative regulator of satellite activation (9), together with increased p38 $\gamma$  signaling which positively regulates the expansion of amplifying satellite cells (7). Since regeneration and repair can result from intense, but also from continuous contractile activity (10), slow fiber-rich muscles contain more satellite cells than fast muscles (6), and are suggested to have a higher turnover rate during normal physiological maintenance of the muscle. Therefore, data indicating a regeneration/repair process are in line with the increased content of slow and decreased number of fast fibers in MK2/3-deficient soleus. Alternatively, given that p38 and MK2/3 are involved in the cellular response to a variety of stress stimuli including oxidative stress (5), the cellular response to oxidative or even mechanical stress stimuli might be somewhat hampered by MK2/3 ablation thus inducing the regeneration processes. Accordingly, the mRNA for matrix metalloproteinase 2, important for elevated collagen processing and biosynthesis following mechanical stress (8), and tenascin C of the endomysium, essential for full-scale muscle damage repair (2, 4), are elevated in MK2/3-deficient soleus. In addition, heat shock proteins as markers for fiber transformation resulting from enhanced neuromuscular activity are enhanced (3).

## Supplementary Table S2

| DESCRIPTION                                                                                                                                                                                                                                                                                                                                                                                                                                                                              | LOCUS                                                                | MK2/3 <sup>-/-</sup>                                                 |
|------------------------------------------------------------------------------------------------------------------------------------------------------------------------------------------------------------------------------------------------------------------------------------------------------------------------------------------------------------------------------------------------------------------------------------------------------------------------------------------|----------------------------------------------------------------------|----------------------------------------------------------------------|
| <b>TRANSCRIPTION</b><br><i>early growth response 1</i><br>myocyte enhancer factor 2C<br>peroxisome proliferative activated receptor, gamma,<br>coactivator 1 alpha, PGC-1 $\alpha$<br><i>serum response factor</i>                                                                                                                                                                                                                                                                       | <i>Egr1</i><br>Mef2c<br>Ppargc1a<br><br><i>Srf</i>                   | <b>-2.034</b><br>1.172<br>2.156<br><br><b>-1.015</b>                 |
| <b>TRANSPORT</b><br>ATPase, Ca <sup>2+</sup> transporting (SERCA2), slow twitch 2<br><i>calcium channel, voltage-dependent, L type, cardiac, Cav1.2a</i><br>Phospholamban<br>ryanodine receptor 2, cardiac (Ryr2)<br>sodium/calcium exchanger, member 1, NCX1<br>sodium/calcium exchanger, member 3, NCX3                                                                                                                                                                                | Atp2a2<br><i>Cacna1c</i><br>Pln/Plb<br>RyR2<br>Slc8a1<br>Slc8a3      | 3.148<br><b>-1.015</b><br>1.014<br>1.106<br>1.150<br>1.103           |
| <b>OTHERS</b><br>actin, alpha 1, skeletal muscle<br>calsequestrin 2, cardiac muscle isoform<br>calcium/calmodulin-dependent protein kinase II, alpha<br>calcium/calmodulin-dependent protein kinase II, beta<br>calcium/calmodulin-dependent protein kinase II, gamma<br>myosin, heavy polypeptide 7 (I/ $\beta$ ), cardiac muscle, beta<br>natriuretic peptide precursor typeA, atrial natriuretic factor (ANF)<br>natriuretic peptide precursor typeB, brain natriuretic peptide (BNP) | Acta1<br>Casq2<br>Camk2a<br>Camk2b<br>Camk2d<br>Myh7<br>Nppa<br>Nppb | 1.032<br>1.012<br>1.880<br>1.971<br>1.750<br>1.103<br>1.057<br>1.098 |

**Table S2** Effects of MK2/3-deficiency on the expression of selected genes in the heart determined by DNA microarray analysis. Changes in transcript levels are shown for a filtered set of genes encoding for transcription factors, transporters, Ca<sup>2+</sup>-handling proteins, and markers for hypertrophy in MK2/3<sup>-/-</sup> vs. WT heart. Down-regulated genes are indicated in bold. Each sample was pooled from the heart of three mice.

## REFERENCES

1. **Carlson BM.** 1968. Regeneration of the completely excised gastrocnemius muscle in the frog and rat from minced muscle fragments. *J. Morphol.* **125**:447-472.
2. **Cramer RM, Aagaard P, Qvortrup K, Langberg H, Olesen J, Kjaer M.** 2007. Myofibre damage in human skeletal muscle: effects of electrical stimulation versus voluntary contraction. *J. Physiol* **583**:365-380.
3. **Donoghue P, Doran P, Wynne K, Pedersen K, Dunn MJ, Ohlendieck K.** 2007. Proteomic profiling of chronic low-frequency stimulated fast muscle. *Proteomics.* **7**:3417-3430.
4. **Fluck M.** 2006. Functional, structural and molecular plasticity of mammalian skeletal muscle in response to exercise stimuli. *J. Exp. Biol.* **209**:2239-2248.
5. **Gaestel M.** 2006. MAPKAP kinases - MKs - two's company, three's a crowd. *Nat. Rev. Mol. Cell Biol.* **7**:120-130.
6. **Gibson MC, Schultz E.** 1983. Age-related differences in absolute numbers of skeletal muscle satellite cells. *Muscle Nerve* **6**:574-580.
7. **Gillespie MA, Le Grand F, Scime A, Kuang S, von Maltzahn J, Seale V, Cuenda A, Ranish JA, Rudnicki MA.** 2009. p38- $\gamma$ -dependent gene silencing restricts entry into the myogenic differentiation program. *J. Cell Biol.* **187**:991-1005.
8. **Koskinen SO, Ahtikoski AM, Komulainen J, Hesselink MK, Drost MR, Takala TE.** 2002. Short-term effects of forced eccentric contractions on collagen synthesis and degradation in rat skeletal muscle. *Pflugers Arch.* **444**:59-72.

MK2/3 regulate cross-striated muscle function

9. **McCroskery S, Thomas M, Maxwell L, Sharma M, Kambadur R.** 2003. Myostatin negatively regulates satellite cell activation and self-renewal. *J. Cell Biol.* **162**:1135-1147.
10. **Widegren U, Ryder JW, Zierath JR.** 2001. Mitogen-activated protein kinase signal transduction in skeletal muscle: effects of exercise and muscle contraction. *Acta Physiol Scand.* **172**:227-238.
11. **Zammit PS, Relaix F, Nagata Y, Ruiz AP, Collins CA, Partridge TA, Beauchamp JR.** 2006. Pax7 and myogenic progression in skeletal muscle satellite cells. *J. Cell Sci.* **119**:1824-1832.
